# Supplementary material for: Connexin26 gap junction mediates miRNA intercellular genetic communication in the cochlea and is required for inner ear development
Source: PubMed Central journal article supplement (PMC4614881; doi:10.1038/srep15647), 2015-10-22
Supplement: srep15647-s1.pdf [file srep15647-s1.pdf]

Supplementary figures:

**Connexin26 gap junction mediates miRNA intercellular genetic communication in the cochlea and is required for inner ear development**

Yan Zhu, Liang Zong, Ling Mei, Hong-Bo Zhao

Department of Otolaryngology, University of Kentucky Medical Center, 800 Rose Street,  
Lexington, Kentucky, USA, 40536

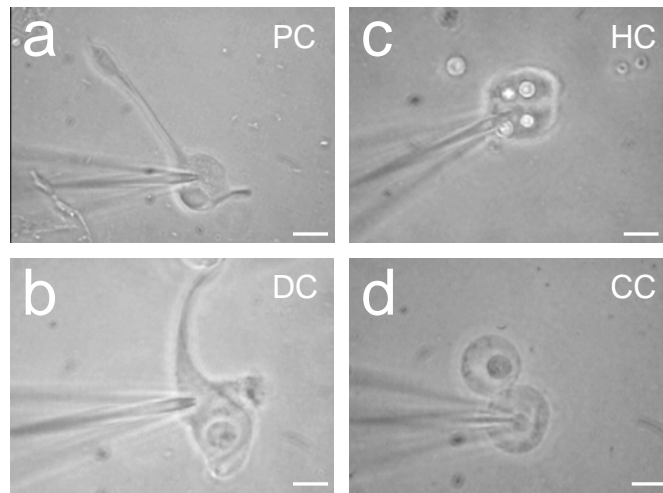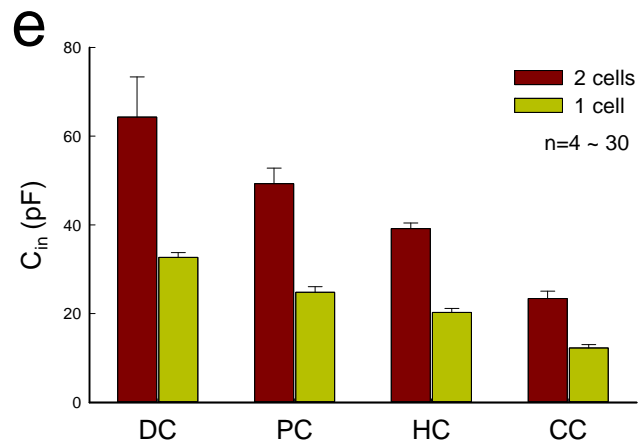

## Supplementary Figure 1

Isolated cochlear supporting cells and input capacitance.

**a-d:** Isolated cochlear supporting cells under patch recording. PC: Pillar cell, DC: Deiters cell, HC: Hensen cell, CC: Claudius cell. Scale bars: 10  $\mu\text{m}$ .

**e:** Input capacitance ( $C_{in}$ ) recorded from single and paired cochlear supporting cells in mice.  $C_{in}$  of 2-coupled cochlear supporting cells is double of  $C_{in}$  in single cochlear supporting cell.

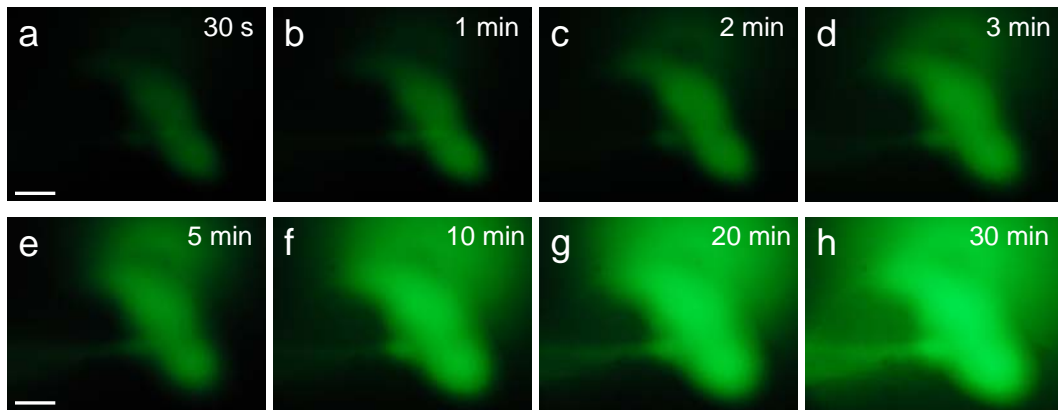

## Supplementary Figure 2

Time-lapse recording of diffusion of fluorescence-tagged miRNA injected at a Deiters cell in the cochlear sensory epithelium. Scale bars: 10  $\mu\text{m}$ .
